# Supplementary material for: Impacts of anemometer changes, site relocations and processing methods on wind speed trends in China
Source: Copernicus journal article supplement (doi:10.5194/amt-2023-58), 2023-04-25
Supplement: Supplementary file 1 [file amt-2023-58-supplement.pdf]

1  
2  
3  
4  
5  
6  
7  
8  
9  
10  
11  
12  
13  
14  
15  
16  
17

**Supplementary Materials for**  
**Impacts of anemometer changes, site relocations and processing methods on**  
**wind speed trends in China**

Yi Liu<sup>1</sup>, Lihong Zhou<sup>1</sup>, Yingzuo Qin<sup>1</sup>, Cesar Azorin-Molina<sup>2</sup>, Cheng Shen<sup>3</sup>, Rongrong  
Xu<sup>1\*</sup>, Zhenzhong Zeng<sup>1\*</sup>

<sup>1</sup> School of Environmental Science and Engineering, Southern University of Science  
and Technology, Shenzhen, China

<sup>2</sup> Centro de Investigaciones sobre Desertificación, Consejo Superior de Investigaciones  
Científicas (CIDE, CSIC-UV-Generalitat Valenciana), Climate, Atmosphere and Ocean  
Laboratory (Climatoc-Lab), Moncada, Valencia, Spain

<sup>3</sup> Regional Climate Group, Department of Earth Sciences, University of Gothenburg,  
Gothenburg, Sweden

\* Correspondence: [xurr@sustech.edu.cn](mailto:xurr@sustech.edu.cn) (R. X); [zengzz@sustech.edu.cn](mailto:zengzz@sustech.edu.cn) (Z. Zeng)

Manuscript for *Atmospheric Measurement Techniques*

March 23, 2023

18 **Table S1. Number of stations left after applying each WMO criteria.**

| Criteria               | Number of stations left |
|------------------------|-------------------------|
| Original               | 840                     |
| a) criteria 3          | 689                     |
| b) criteria 1 and 3    | 641                     |
| c) criteria 1, 2 and 3 | 601                     |

19 \*The three WMO criteria used are: 1) <11 missing daily values in a month; 2) <5  
20 consecutive missing daily values in a month; 3) complete monthly values for every  
21 month during the study period.

22

23 **Table S2. Relocated stations details.**

| Change                            | Number of stations |
|-----------------------------------|--------------------|
| Latitude or longitude             | 311                |
| Altitude                          | 218                |
| Latitude or longitude or altitude | 432                |

24

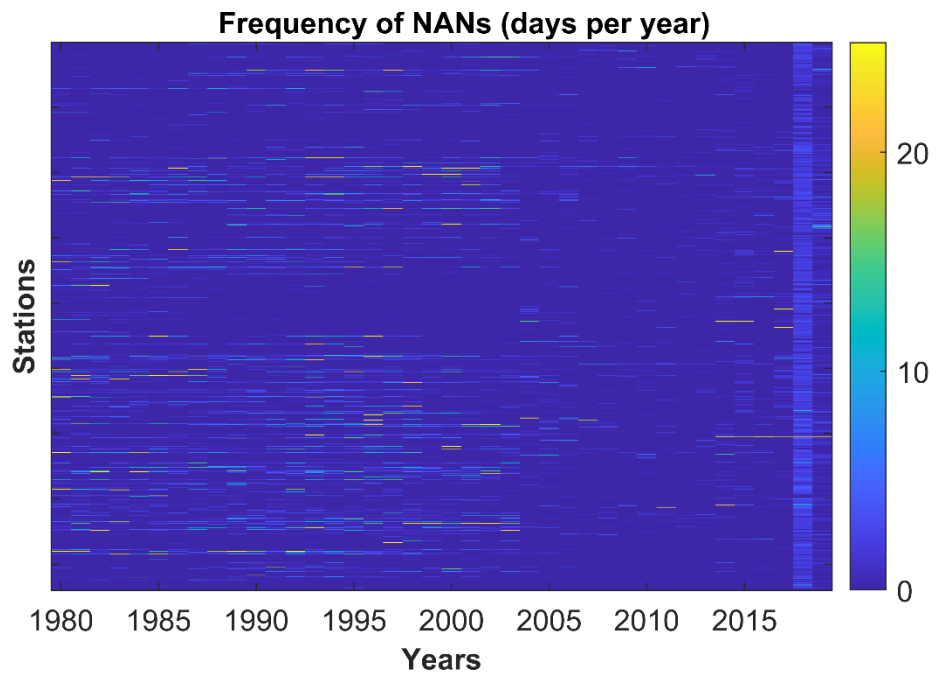

25

26 **Figure S1. Frequency of NaNs (days per year) for 840 stations in CSD from 1980**

27 **until 2019.** Each row represents one station.

28

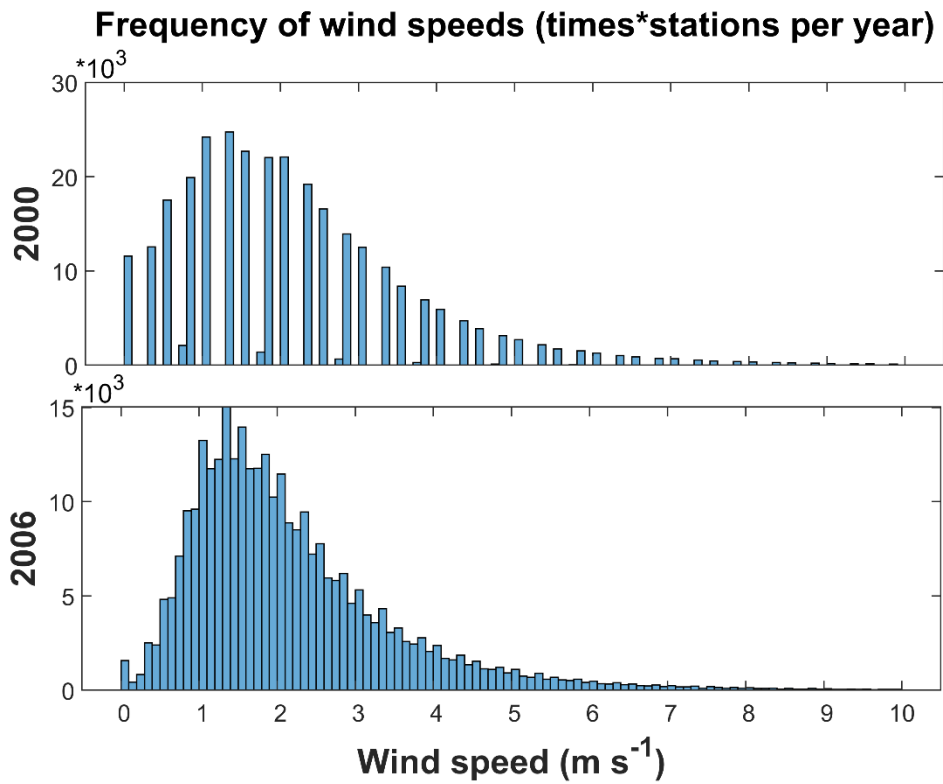

29

30 **Figure S2. Change in wind speed data caused by updates in anemometer changes**  
 31 **and processing methods. Daily wind speed distribution of all stations in 2000 (old**  
 32 **system) versus 2006 (new system).**

33

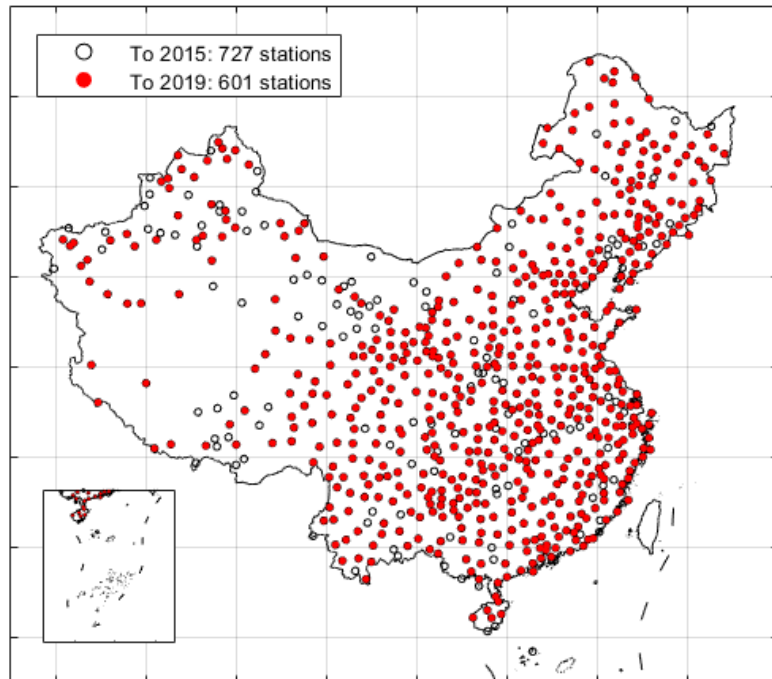

34

35 **Figure S3. Distribution of stations that passed the WMO criteria.** The black hollow  
36 circles are the 727 stations till 2015 and the filled red circles are the 601 stations till  
37 2019. Maps information are from Department of Natural Resources standard map  
38 service system of China.

39

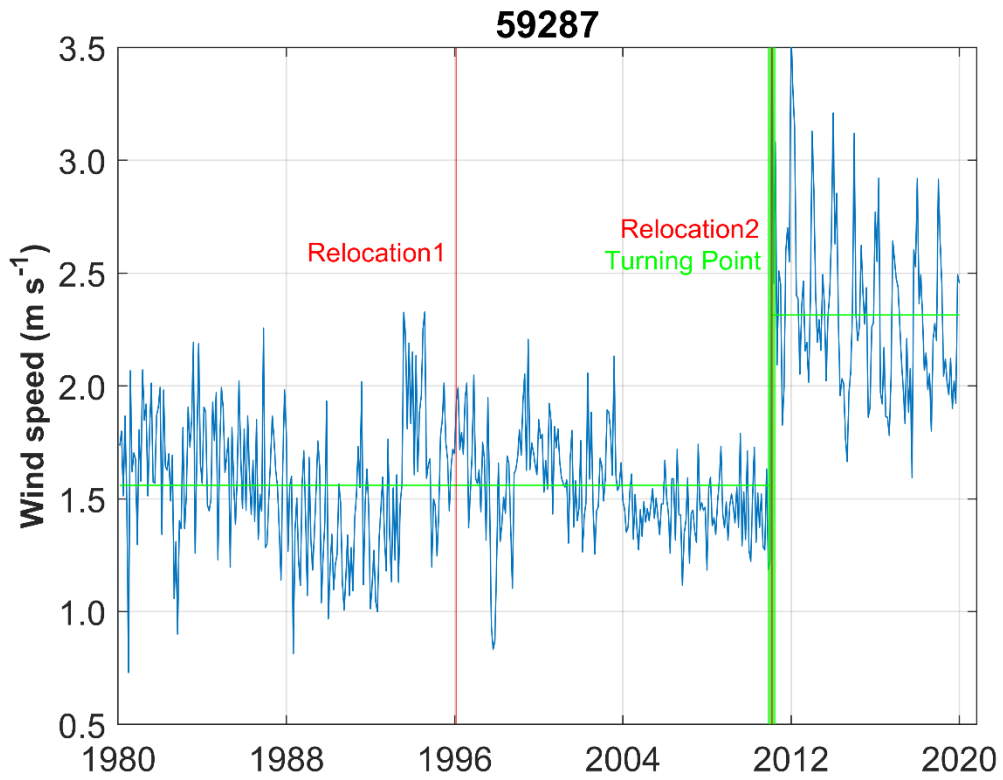

40

41 **Figure S4. Time series of Station 59287 (Guangzhou) and the two relocations.** The  
42 blue line is the monthly wind speed. The two red lines are the relocations and the thick  
43 green line is the detected turning point in 2011.

44

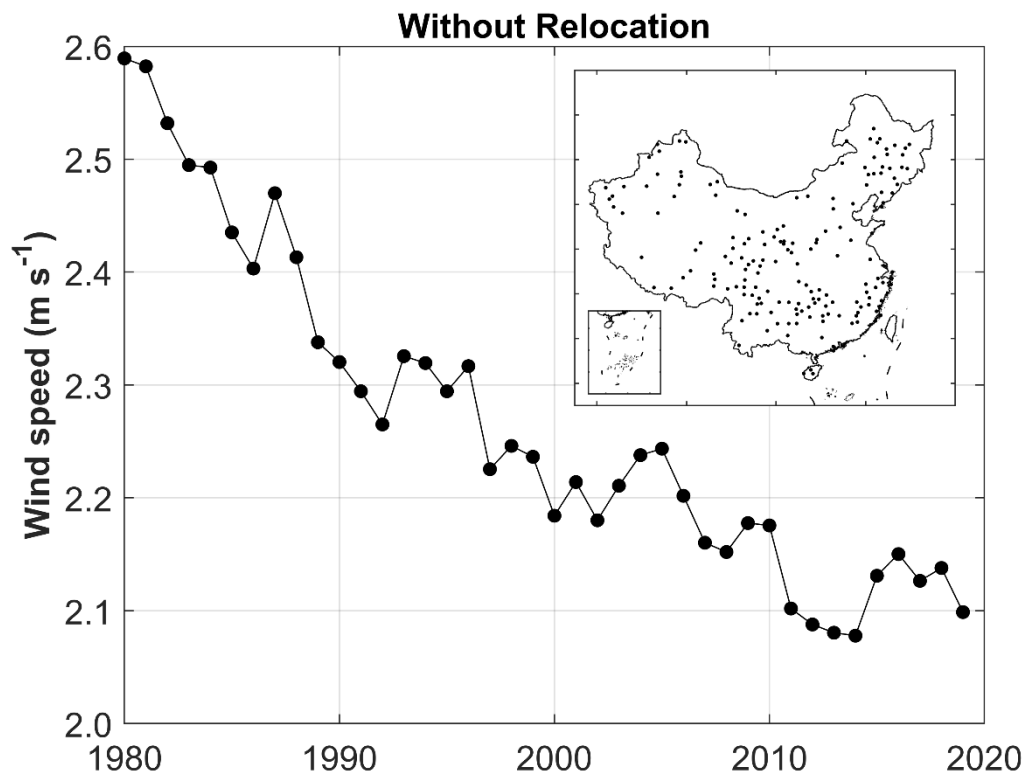

45

46 **Figure S5. Averaged annual wind speed of 169 stations without relocation.** The

47 inset shows the station distribution across China. Maps information are from

48 Department of Natural Resources standard map service system of China.

49
